# Supplementary material for: Somatic genetic variants associated with aggressiveness of urothelial bladder cancer: a prospective cohort study
Source: Research Square preprint supplement (doi:10.21203/rs.3.rs-6553154/v1), 2025-05-12
Supplement: Supplementary file 1 [file 20884f8de5413b4daa213d7c.docx]

**Supplementary Data 2**

Table : Details of all the SNVs included in the association analysis of the SNVs in relation to aggressiveness in bladder cancer

|  |  | **Codominant** | | | **Dominant** | | **Recessive** | | **Overdominant** | | **Log-additive** |
| --- | --- | --- | --- | --- | --- | --- | --- | --- | --- | --- | --- |
| Rs2228001 | **Genotype** | G/G | G/T | T/T | G/G | G/T-T/T | G/G-G/T | T/T | G/G-T/T | G/T | --- |
| Muscle invasive | **mi=0** | 3 (13%) | 12 (52.2%) | 8 (34.8%) | 3 (13%) | 20 (87%) | 15 (65.2%) | 8 (34.8%) | 11 (47.8%) | 12 (52.2%) | --- |
|  | **mi=1** | 6 (46.1%) | 3 (23.1%) | 4 (30.8%) | 6 (46.1%) | 7 (53.9%) | 9 (69.2%) | 4 (30.8%) | 10 (76.9%) | 3 (23.1%) | --- |
|  | **OR (95% CI)** | 01.00 | **0.13 (0.02-0.82)** | 0.25 (0.04-1.56) | 01.00 | **0.18 (0.03-0.89)** | 01.00 | 0.83 (0.19-3.58) | 01.00 | 0.28 (0.06-1.27) | 0.52 (0.20-1.32) |
|  | **P-value** | 0.069 | | | 00.03 | | 0,05625 | | 0.082 | | 00.16 |
| Rs2228001 | **Genotype** | G/G | G/T | T/T | G/G | G/T-T/T | G/G-G/T | T/T | G/G-T/T | G/T | --- |
| grade | **grade=1** | 2 (11.8%) | 9 (52.9%) | 6 (35.3%) | 2 (11.8%) | 15 (88.2%) | 11 (64.7%) | 6 (35.3%) | 8 (47.1%) | 9 (52.9%) | --- |
|  | **grade=2** | 7 (36.8%) | 6 (31.6%) | 6 (31.6%) | 7 (36.8%) | 12 (63.2%) | 13 (68.4%) | 6 (31.6%) | 13 (68.4%) | 6 (31.6%) | --- |
|  | **OR (95% CI)** | 01.00 | 0.19 (0.03-1.25) | 0.29 (0.04-1.98) | 01.00 | 0.23 (0.04-1.31) | 01.00 | 0.85 (0.21-3.39) | 01.00 | 0.41 (0.11-1.59) | 0.60 (0.25-1.46) |
|  | **P-value** | 00.18 | | | 0.075 | | 0,05625 | | 00.19 | | 00.25 |
|  | **AIC** | 52.04.00 | | | 50.06.00 | | 53.07.00 | | 52.01.00 | | 52.05.00 |
|  | **BIC** | 57.01.00 | | | 53.08.00 | | 56.09.00 | | 55.03.00 | | 55.07.00 |
| rs1052133 | **Genotype** | C/C | C/G | G/G | C/C | C/G-G/G | C/C-C/G | G/G | C/C-G/G | C/G | --- |
| grade | **grade=1** | 6 (35.3%) | 7 (41.2%) | 4 (23.5%) | 6 (35.3%) | 11 (64.7%) | 13 (76.5%) | 4 (23.5%) | 10 (58.8%) | 7 (41.2%) | --- |
|  | **grade=2** | 8 (38.1%) | 12 (57.1%) | 1 (4.8%) | 8 (38.1%) | 13 (61.9%) | 20 (95.2%) | 1 (4.8%) | 9 (42.9%) | 12 (57.1%) | --- |
|  | **OR (95% CI)** | 01.00 | 1.29 (0.31-5.27) | 0.19 (0.02-2.14) | 01.00 | 0.89 (0.23-3.35) | 01.00 | 0.16 (0.02-1.62) | 01.00 | 1.90 (0.52-6.96) | 0.61 (0.23-1.63) |
|  | **P-value** | 00.21 | | | 0,059722222 | | 0.083 | | 00.33 | | 00.32 |
| rs1052133 | **Genotype** | C/C | C/G | G/G | C/C | C/G-G/G | C/C-C/G | G/G | C/C-G/G | C/G | --- |
| Muscle invasive | **mi=0** | 8 (33.3%) | 11 (45.8%) | 5 (20.8%) | 8 (33.3%) | 16 (66.7%) | 19 (79.2%) | 5 (20.8%) | 13 (54.2%) | 11 (45.8%) | --- |
|  | **mi=1** | 6 (42.9%) | 8 (57.1%) | 0 (0%) | 6 (42.9%) | 8 (57.1%) | 14 (100%) | 0 (0%) | 6 (42.9%) | 8 (57.1%) | --- |
|  | **OR (95% CI)** | 1 | 0.97 (0.24-3.92) | 0.00 (0.00-NA) | 1 | 0.67 (0.17-2.59) | 1 | 0.00 (0.00-NA) | 1 | 1.58 (0.42-5.95) | 0.48 (0.17-1.41) |
|  | **P-value** | 0,081 | | | 0,56 | | 0,025 | | 0,5 | | 0,17 |
| rs10775480 | **Genotype** | T/T | C/T | C/C | T/T | C/T-C/C | T/T-C/T | C/C | T/T-C/C | C/T | --- |
| grade | **grade=1** | 2 (13.3%) | 7 (46.7%) | 6 (40%) | 2 (13.3%) | 13 (86.7%) | 9 (60%) | 6 (40%) | 8 (53.3%) | 7 (46.7%) | --- |
|  | **grade=2** | 0 (0%) | 3 (18.8%) | 13 (81.2%) | 0 (0%) | 16 (100%) | 3 (18.8%) | 13 (81.2%) | 13 (81.2%) | 3 (18.8%) | --- |
|  | **OR (95% CI)** | 1 | NA (0.00-NA) | NA (0.00-NA) | 1 | NA (0.00-NA) | 1 | **6.50 (1.28-33.04)** | 1 | 0.26 (0.05-1.32) | **5.87 (1.28-26.96)** |
|  | **P-value** | 0,03 | | | 0,081 | | 0,016 | | 0,093 | | 0,0094 |
| rs10775480 | **Genotype** | T/T | C/T | C/C | T/T | C/T-C/C | T/T-C/T | C/C | T/T-C/C | C/T | --- |
| Muscle invasive | **mi=0** | 2 (10%) | 7 (35%) | 11 (55%) | 2 (10%) | 18 (90%) | 9 (45%) | 11 (55%) | 13 (65%) | 7 (35%) | --- |
|  | **mi=1** | 0 (0%) | 3 (27.3%) | 8 (72.7%) | 0 (0%) | 11 (100%) | 3 (27.3%) | 8 (72.7%) | 8 (72.7%) | 3 (27.3%) | --- |
|  | **OR (95% CI)** | 1 | NA (0.00-NA) | NA (0.00-NA) | 1 | NA (0.00-NA) | 1 | 2.18 (0.44-10.73) | 1 | 0.70 (0.14-3.50) | 2.31 (0.57-9.35) |
|  | **P-value** | 0,33 | | | 0,18 | | 0,33 | | 0,66 | | 0,21 |
| rs10936599 | **Genotype** | C/C | C/T | T/T | C/C | C/T-T/T | C/C-C/T | T/T | C/C-T/T | C/T | --- |
| grade | **grade=1** | 15 (88.2%) | 2 (11.8%) | 0 (0%) | 15 (88.2%) | 2 (11.8%) | 17 (100%) | 0 (0%) | 15 (88.2%) | 2 (11.8%) | --- |
|  | **grade=2** | 13 (68.4%) | 4 (21.1%) | 2 (10.5%) | 13 (68.4%) | 6 (31.6%) | 17 (89.5%) | 2 (10.5%) | 15 (79%) | 4 (21.1%) | --- |
|  | **OR (95% CI)** | 1 | 2.31 (0.36-14.72) | NA (0.00-NA) | 1 | 3.46 (0.59-20.21) | 1 | NA (0.00-NA) | 1 | 2.00 (0.32-12.62) | 3.27 (0.70-15.31) |
|  | **P-value** | 0,18 | | | 0,14 | | 0,1 | | 0,45 | | 0,087 |
| rs10936599 | **Genotype** | C/C | C/T | T/T | C/C | C/T-T/T | C/C-C/T | T/T | C/C-T/T | C/T | --- |
| Muscle invasive | **mi=0** | 18 (78.3%) | 5 (21.7%) | 0 (0%) | 18 (78.3%) | 5 (21.7%) | 23 (100%) | 0 (0%) | 18 (78.3%) | 5 (21.7%) | --- |
|  | **mi=1** | 10 (76.9%) | 1 (7.7%) | 2 (15.4%) | 10 (76.9%) | 3 (23.1%) | 11 (84.6%) | 2 (15.4%) | 12 (92.3%) | 1 (7.7%) | --- |
|  | **OR (95% CI)** | 1 | 0.36 (0.04-3.53) | NA (0.00-NA) | 1 | 1.08 (0.21-5.49) | 1 | NA (0.00-NA) | 1 | 0.30 (0.03-2.90) | 1.68 (0.51-5.53) |
|  | **P-value** | 0,075 | | | 0,93 | | 0,038 | | 0,25 | | 0,4 |
| rs17674580 | **Genotype** | C/C | C/T | T/T | C/C | C/T-T/T | C/C-C/T | T/T | C/C-T/T | C/T | --- |
| grade | **grade=1** | 5 (33.3%) | 9 (60%) | 1 (6.7%) | 5 (33.3%) | 10 (66.7%) | 14 (93.3%) | 1 (6.7%) | 6 (40%) | 9 (60%) | --- |
|  | **grade=2** | 12 (70.6%) | 4 (23.5%) | 1 (5.9%) | 12 (70.6%) | 5 (29.4%) | 16 (94.1%) | 1 (5.9%) | 13 (76.5%) | 4 (23.5%) | --- |
|  | **OR (95% CI)** | 1 | **0.19 (0.04-0.89)** | 0.42 (0.02-8.05) | 1 | **0.21 (0.05-0.93)** | 1 | 0.88 (0.05-15.33) | 1 | **0.21 (0.04-0.94)** | 0.34 (0.09-1.19) |
|  | **P-value** | 0,09 | | | 0,033 | | 0,93 | | 0,034 | | 0,074 |
| rs17674580 | **Genotype** | C/C | C/T | T/T | C/C | C/T-T/T | C/C-C/T | T/T | C/C-T/T | C/T | --- |
| Muscle invasive | **mi=0** | 9 (40.9%) | 11 (50%) | 2 (9.1%) | 9 (40.9%) | 13 (59.1%) | 20 (90.9%) | 2 (9.1%) | 11 (50%) | 11 (50%) | --- |
|  | **mi=1** | 8 (80%) | 2 (20%) | 0 (0%) | 8 (80%) | 2 (20%) | 10 (100%) | 0 (0%) | 8 (80%) | 2 (20%) | --- |
|  | **OR (95% CI)** | 1 | 0.20 (0.03-1.22) | 0.00 (0.00-NA) | 1 | 0.17 (0.03-1.01) | 1 | 0.00 (0.00-NA) | 1 | 0.25 (0.04-1.45) | 0.19 (0.03-1.02) |
|  | **P-value** | 0,079 | | | 0,035 | | 0,21 | | 0,099 | | 0,026 |
| rs1799964 | **Genotype** | T/T | T/C | C/C | T/T | T/C-C/C | T/T-T/C | C/C | T/T-C/C | T/C | --- |
| grade | **grade=1** | 14 (73.7%) | 4 (21.1%) | 1 (5.3%) | 14 (73.7%) | 5 (26.3%) | 18 (94.7%) | 1 (5.3%) | 15 (79%) | 4 (21.1%) | --- |
|  | **grade=2** | 7 (33.3%) | 10 (47.6%) | 4 (19.1%) | 7 (33.3%) | 14 (66.7%) | 17 (81%) | 4 (19.1%) | 11 (52.4%) | 10 (47.6%) | --- |
|  | **OR (95% CI)** | 1 | **5.00 (1.15-21.80)** | 8.00 (0.75-85.73) | 1 | **5.60 (1.43-21.95)** | 1 | 4.24 (0.43-41.80) | 1 | 3.41 (0.84-13.77) | **3.60 (1.20-10.74)** |
|  | **P-value** | 0,032 | | | 0,0095 | | 0,17 | | 0,075 | | 0,011 |
| rs1799964 | **Genotype** | T/T | T/C | C/C | T/T | T/C-C/C | T/T-T/C | C/C | T/T-C/C | T/C | --- |
| Muscle invasive | **mi=0** | 16 (61.5%) | 8 (30.8%) | 2 (7.7%) | 16 (61.5%) | 10 (38.5%) | 24 (92.3%) | 2 (7.7%) | 18 (69.2%) | 8 (30.8%) | --- |
|  | **mi=1** | 5 (35.7%) | 6 (42.9%) | 3 (21.4%) | 5 (35.7%) | 9 (64.3%) | 11 (78.6%) | 3 (21.4%) | 8 (57.1%) | 6 (42.9%) | --- |
|  | **OR (95% CI)** | 1 | 2.40 (0.56-10.32) | 4.80 (0.62-37.35) | 1 | 2.88 (0.75-11.10) | 1 | 3.27 (0.48-22.46) | 1 | 1.69 (0.44-6.49) | 2.24 (0.86-5.84) |
|  | **P-value** | 0,24 | | | 0,12 | | 0,22 | | 0,45 | | 0,09 |
| rs1801320 | **Genotype** | G/G | C/G | C/C | G/G | C/G-C/C | G/G-C/G | C/C | G/G-C/C | C/G | --- |
| grade | **grade=1** | 11 (68.8%) | 5 (31.2%) | 0 (0%) | 11 (68.8%) | 5 (31.2%) | 16 (100%) | 0 (0%) | 11 (68.8%) | 5 (31.2%) | --- |
|  | **grade=2** | 12 (66.7%) | 5 (27.8%) | 1 (5.6%) | 12 (66.7%) | 6 (33.3%) | 17 (94.4%) | 1 (5.6%) | 13 (72.2%) | 5 (27.8%) | --- |
|  | **OR (95% CI)** | 1 | 0.92 (0.21-4.05) | NA (0.00-NA) | 1 | 1.10 (0.26-4.65) | 1 | NA (0.00-NA) | 1 | 0.85 (0.19-3.71) | 1.31 (0.37-4.68) |
|  | **P-value** | 0,52 | | | 0,9 | | 0,25 | | 0,82 | | 0,68 |
| rs1801320 | **Genotype** | G/G | C/G | C/C | G/G | C/G-C/C | G/G-C/G | C/C | G/G-C/C | C/G | --- |
| Muscle invasive | **mi=0** | 14 (63.6%) | 7 (31.8%) | 1 (4.5%) | 14 (63.6%) | 8 (36.4%) | 21 (95.5%) | 1 (4.5%) | 15 (68.2%) | 7 (31.8%) | --- |
|  | **mi=1** | 9 (75%) | 3 (25%) | 0 (0%) | 9 (75%) | 3 (25%) | 12 (100%) | 0 (0%) | 9 (75%) | 3 (25%) | --- |
|  | **OR (95% CI)** | 1 | 0.67 (0.14-3.27) | 0.00 (0.00-NA) | 1 | 0.58 (0.12-2.80) | 1 | 0.00 (0.00-NA) | 1 | 0.71 (0.15-3.49) | 0.55 (0.13-2.31) |
|  | **P-value** | 0,56 | | | 0,49 | | 0,35 | | 0,67 | | 0,4 |
| rs1946518 | **Genotype** | T/T | G/T | G/G | T/T | G/T-G/G | T/T-G/T | G/G | T/T-G/G | G/T | --- |
| grade | **grade=1** | 3 (18.8%) | 3 (18.8%) | 10 (62.5%) | 3 (18.8%) | 13 (81.2%) | 6 (37.5%) | 10 (62.5%) | 13 (81.2%) | 3 (18.8%) | --- |
|  | **grade=2** | 2 (10%) | 6 (30%) | 12 (60%) | 2 (10%) | 18 (90%) | 8 (40%) | 12 (60%) | 14 (70%) | 6 (30%) | --- |
|  | **OR (95% CI)** | 1 | 3.00 (0.31-28.84) | 1.80 (0.25-12.99) | 1 | 2.08 (0.30-14.25) | 1 | 0.90 (0.23-3.47) | 1 | 1.86 (0.38-9.00) | 1.13 (0.46-2.78) |
|  | **P-value** | 0,62 | | | 0,45 | | 0,88 | | 0,43 | | 0,8 |
| rs1946518 | **Genotype** | T/T | G/T | G/G | T/T | G/T-G/G | T/T-G/T | G/G | T/T-G/G | G/T | --- |
| Muscle invasive | **mi=0** | 3 (13%) | 5 (21.7%) | 15 (65.2%) | 3 (13%) | 20 (87%) | 8 (34.8%) | 15 (65.2%) | 18 (78.3%) | 5 (21.7%) | --- |
|  | **mi=1** | 2 (15.4%) | 4 (30.8%) | 7 (53.9%) | 2 (15.4%) | 11 (84.6%) | 6 (46.1%) | 7 (53.9%) | 9 (69.2%) | 4 (30.8%) | --- |
|  | **OR (95% CI)** | 1 | 1.20 (0.13-11.05) | 0.70 (0.09-5.18) | 1 | 0.83 (0.12-5.71) | 1 | 0.62 (0.16-2.49) | 1 | 1.60 (0.34-7.46) | 0.77 (0.31-1.95) |
|  | **P-value** | 0,79 | | | 0,85 | | 0,5 | | 0,55 | | 0,59 |
| rs2294008 | **Genotype** | C/C | C/T | T/T | C/C | C/T-T/T | C/C-C/T | T/T | C/C-T/T | C/T | --- |
| grade | **grade=1** | 9 (47.4%) | 6 (31.6%) | 4 (21.1%) | 9 (47.4%) | 10 (52.6%) | 15 (79%) | 4 (21.1%) | 13 (68.4%) | 6 (31.6%) | --- |
|  | **grade=2** | 8 (40%) | 9 (45%) | 3 (15%) | 8 (40%) | 12 (60%) | 17 (85%) | 3 (15%) | 11 (55%) | 9 (45%) | --- |
|  | **OR (95% CI)** | 1 | 1.69 (0.41-6.88) | 0.84 (0.14-4.97) | 1 | 1.35 (0.38-4.80) | 1 | 0.66 (0.13-3.45) | 1 | 1.77 (0.48-6.56) | 1.02 (0.44-2.39) |
|  | **P-value** | 0,68 | | | 0,64 | | 0,62 | | 0,39 | | 0,96 |
| rs2294008 | **Genotype** | C/C | C/T | T/T | C/C | C/T-T/T | C/C-C/T | T/T | C/C-T/T | C/T | --- |
| Muscle invasive | **mi=0** | 10 (41.7%) | 8 (33.3%) | 6 (25%) | 10 (41.7%) | 14 (58.3%) | 18 (75%) | 6 (25%) | 16 (66.7%) | 8 (33.3%) | --- |
|  | **mi=1** | 7 (46.7%) | 7 (46.7%) | 1 (6.7%) | 7 (46.7%) | 8 (53.3%) | 14 (93.3%) | 1 (6.7%) | 8 (53.3%) | 7 (46.7%) | --- |
|  | **OR (95% CI)** | 1 | 1.25 (0.31-5.07) | 0.24 (0.02-2.44) | 1 | 0.82 (0.22-2.99) | 1 | 0.21 (0.02-1.99) | 1 | 1.75 (0.47-6.57) | 0.64 (0.26-1.60) |
|  | **P-value** | 0,29 | | | 0,76 | | 0,12 | | 0,41 | | 0,33 |
| rs2854744 | **Genotype** | G/G | G/T | T/T | G/G | G/T-T/T | G/G-G/T | T/T | G/G-T/T | G/T | --- |
| grade | **grade=1** | 9 (52.9%) | 4 (23.5%) | 4 (23.5%) | 9 (52.9%) | 8 (47.1%) | 13 (76.5%) | 4 (23.5%) | 13 (76.5%) | 4 (23.5%) | --- |
|  | **grade=2** | 7 (36.8%) | 7 (36.8%) | 5 (26.3%) | 7 (36.8%) | 12 (63.2%) | 14 (73.7%) | 5 (26.3%) | 12 (63.2%) | 7 (36.8%) | --- |
|  | **OR (95% CI)** | 1 | 2.25 (0.47-10.88) | 1.61 (0.31-8.32) | 1 | 1.93 (0.51-7.31) | 1 | 1.16 (0.25-5.29) | 1 | 1.90 (0.44-8.14) | 1.34 (0.59-3.03) |
|  | **P-value** | 0,58 | | | 0,33 | | 0,85 | | 0,38 | | 0,48 |
| rs2854744 | **Genotype** | G/G | G/T | T/T | G/G | G/T-T/T | G/G-G/T | T/T | G/G-T/T | G/T | --- |
| Muscle invasive | **mi=0** | 11 (47.8%) | 7 (30.4%) | 5 (21.7%) | 11 (47.8%) | 12 (52.2%) | 18 (78.3%) | 5 (21.7%) | 16 (69.6%) | 7 (30.4%) | --- |
|  | **mi=1** | 5 (38.5%) | 4 (30.8%) | 4 (30.8%) | 5 (38.5%) | 8 (61.5%) | 9 (69.2%) | 4 (30.8%) | 9 (69.2%) | 4 (30.8%) | --- |
|  | **OR (95% CI)** | 1 | 1.26 (0.25-6.36) | 1.76 (0.33-9.51) | 1 | 1.47 (0.37-5.86) | 1 | 1.60 (0.34-7.46) | 1 | 1.02 (0.23-4.44) | 1.32 (0.57-3.06) |
|  | **P-value** | 0,81 | | | 0,59 | | 0,55 | | 0,98 | | 0,51 |
| rs2989734 | **Genotype** | A/A | G/A | G/G | A/A | G/A-G/G | A/A-G/A | G/G | A/A-G/G | G/A | --- |
| grade | **grade=1** | 3 (15.8%) | 9 (47.4%) | 7 (36.8%) | 3 (15.8%) | 16 (84.2%) | 12 (63.2%) | 7 (36.8%) | 10 (52.6%) | 9 (47.4%) | --- |
|  | **grade=2** | 2 (9.1%) | 7 (31.8%) | 13 (59.1%) | 2 (9.1%) | 20 (90.9%) | 9 (40.9%) | 13 (59.1%) | 15 (68.2%) | 7 (31.8%) | --- |
|  | **OR (95% CI)** | 1 | 1.17 (0.15-9.01) | 2.79 (0.37-20.82) | 1 | 1.88 (0.28-12.61) | 1 | 2.48 (0.70-8.74) | 1 | 0.52 (0.15-1.85) | 1.86 (0.74-4.71) |
|  | **P-value** | 0,36 | | | 0,51 | | 0,15 | | 0,31 | | 0,18 |
| rs2989734 | **Genotype** | A/A | G/A | G/G | A/A | G/A-G/G | A/A-G/A | G/G | A/A-G/G | G/A | --- |
| Muscle invasive | **mi=0** | 3 (11.5%) | 12 (46.1%) | 11 (42.3%) | 3 (11.5%) | 23 (88.5%) | 15 (57.7%) | 11 (42.3%) | 14 (53.9%) | 12 (46.1%) | --- |
|  | **mi=1** | 2 (13.3%) | 4 (26.7%) | 9 (60%) | 2 (13.3%) | 13 (86.7%) | 6 (40%) | 9 (60%) | 11 (73.3%) | 4 (26.7%) | --- |
|  | **OR (95% CI)** | 1 | 0.50 (0.06-4.15) | 1.23 (0.17-9.02) | 1 | 0.85 (0.13-5.75) | 1 | 2.05 (0.56-7.45) | 1 | 0.42 (0.11-1.69) | 1.41 (0.54-3.66) |
|  | **P-value** | 0,45 | | | 0,87 | | 0,27 | | 0,21 | | 0,47 |
| rs401681 | **Genotype** | C/C | T/C | T/T | C/C | T/C-T/T | C/C-T/C | T/T | C/C-T/T | T/C | --- |
| grade | **grade=1** | 10 (62.5%) | 5 (31.2%) | 1 (6.2%) | 10 (62.5%) | 6 (37.5%) | 15 (93.8%) | 1 (6.2%) | 11 (68.8%) | 5 (31.2%) | --- |
|  | **grade=2** | 14 (66.7%) | 6 (28.6%) | 1 (4.8%) | 14 (66.7%) | 7 (33.3%) | 20 (95.2%) | 1 (4.8%) | 15 (71.4%) | 6 (28.6%) | --- |
|  | **OR (95% CI)** | 1 | 0.86 (0.20-3.61) | 0.71 (0.04-12.83) | 1 | 0.83 (0.21-3.24) | 1 | 0.75 (0.04-12.99) | 1 | 0.88 (0.21-3.64) | 0.85 (0.28-2.55) |
|  | **P-value** | 0,96 | | | 0,79 | | 0,84 | | 0,86 | | 0,77 |
| rs401681 | **Genotype** | C/C | T/C | T/T | C/C | T/C-T/T | C/C-T/C | T/T | C/C-T/T | T/C | --- |
| Muscle invasive | **mi=0** | 17 (73.9%) | 5 (21.7%) | 1 (4.3%) | 17 (73.9%) | 6 (26.1%) | 22 (95.7%) | 1 (4.3%) | 18 (78.3%) | 5 (21.7%) | --- |
|  | **mi=1** | 7 (50%) | 6 (42.9%) | 1 (7.1%) | 7 (50%) | 7 (50%) | 13 (92.9%) | 1 (7.1%) | 8 (57.1%) | 6 (42.9%) | --- |
|  | **OR (95% CI)** | 1 | 2.91 (0.66-12.77) | 2.43 (0.13-44.50) | 1 | 2.83 (0.70-11.51) | 1 | 1.69 (0.10-29.41) | 1 | 2.70 (0.63-11.51) | 2.14 (0.68-6.71) |
|  | **P-value** | 0,34 | | | 0,14 | | 0,72 | | 0,18 | | 0,19 |
| rs4976845 | **Genotype** | C/C | T/C | T/T | C/C | T/C-T/T | C/C-T/C | T/T | C/C-T/T | T/C | --- |
| grade | **grade=1** | 9 (50%) | 7 (38.9%) | 2 (11.1%) | 9 (50%) | 9 (50%) | 16 (88.9%) | 2 (11.1%) | 11 (61.1%) | 7 (38.9%) | --- |
|  | **grade=2** | 11 (52.4%) | 8 (38.1%) | 2 (9.5%) | 11 (52.4%) | 10 (47.6%) | 19 (90.5%) | 2 (9.5%) | 13 (61.9%) | 8 (38.1%) | --- |
|  | **OR (95% CI)** | 1 | 0.94 (0.24-3.58) | 0.82 (0.10-7.02) | 1 | 0.91 (0.26-3.20) | 1 | 0.84 (0.11-6.67) | 1 | 0.97 (0.27-3.53) | 0.92 (0.36-2.35) |
|  | **P-value** | 0,98 | | | 0,88 | | 0,87 | | 0,96 | | 0,85 |
| rs4976845 | **Genotype** | C/C | T/C | T/T | C/C | T/C-T/T | C/C-T/C | T/T | C/C-T/T | T/C | --- |
| Muscle invasive | **mi=0** | 14 (56%) | 8 (32%) | 3 (12%) | 14 (56%) | 11 (44%) | 22 (88%) | 3 (12%) | 17 (68%) | 8 (32%) | --- |
|  | **mi=1** | 6 (42.9%) | 7 (50%) | 1 (7.1%) | 6 (42.9%) | 8 (57.1%) | 13 (92.9%) | 1 (7.1%) | 7 (50%) | 7 (50%) | --- |
|  | **OR (95% CI)** | 1 | 2.04 (0.51-8.23) | 0.78 (0.07-9.08) | 1 | 1.70 (0.45-6.36) | 1 | 0.56 (0.05-6.00) | 1 | 2.12 (0.55-8.14) | 1.20 (0.45-3.17) |
|  | **P-value** | 0,53 | | | 0,43 | | 0,62 | | 0,27 | | 0,71 |
| rs7238033 | **Genotype** | T/T | C/T | C/C | T/T | C/T-C/C | T/T-C/T | C/C | T/T-C/C | C/T | --- |
| grade | **grade=1** | 1 (5.6%) | 9 (50%) | 8 (44.4%) | 1 (5.6%) | 17 (94.4%) | 10 (55.6%) | 8 (44.4%) | 9 (50%) | 9 (50%) | --- |
|  | **grade=2** | 2 (9.5%) | 4 (19.1%) | 15 (71.4%) | 2 (9.5%) | 19 (90.5%) | 6 (28.6%) | 15 (71.4%) | 17 (81%) | 4 (19.1%) | --- |
|  | **OR (95% CI)** | 1 | 0.22 (0.02-3.22) | 0.94 (0.07-12.00) | 1 | 0.56 (0.05-6.73) | 1 | 3.12 (0.83-11.78) | 1 | **0.24 (0.06-0.98)** | 1.79 (0.64-4.98) |
|  | **P-value** | 0,12 | | | 0,64 | | 0,086 | | 0,039 | | 0,26 |
| rs7238033 | **Genotype** | T/T | C/T | C/C | T/T | C/T-C/C | T/T-C/T | C/C | T/T-C/C | C/T | --- |
| Muscle invasive | **mi=0** | 2 (8.3%) | 10 (41.7%) | 12 (50%) | 2 (8.3%) | 22 (91.7%) | 12 (50%) | 12 (50%) | 14 (58.3%) | 10 (41.7%) | --- |
|  | **mi=1** | 1 (6.7%) | 3 (20%) | 11 (73.3%) | 1 (6.7%) | 14 (93.3%) | 4 (26.7%) | 11 (73.3%) | 12 (80%) | 3 (20%) | --- |
|  | **OR (95% CI)** | 1 | 0.60 (0.04-9.16) | 1.83 (0.15-23.16) | 1 | 1.27 (0.11-15.39) | 1 | 2.75 (0.68-11.11) | 1 | 0.35 (0.08-1.57) | 1.96 (0.64-6.04) |
|  | **P-value** | 0,32 | | | 0,85 | | 0,14 | | 0,15 | | 0,22 |
| rs907611 | **Genotype** | G/G | G/A | A/A | G/G | G/A-A/A | G/G-G/A | A/A | G/G-A/A | G/A | --- |
| grade | **grade=1** | 10 (58.8%) | 5 (29.4%) | 2 (11.8%) | 10 (58.8%) | 7 (41.2%) | 15 (88.2%) | 2 (11.8%) | 12 (70.6%) | 5 (29.4%) | --- |
|  | **grade=2** | 11 (61.1%) | 5 (27.8%) | 2 (11.1%) | 11 (61.1%) | 7 (38.9%) | 16 (88.9%) | 2 (11.1%) | 13 (72.2%) | 5 (27.8%) | --- |
|  | **OR (95% CI)** | 1 | 0.91 (0.20-4.10) | 0.91 (0.11-7.72) | 1 | 0.91 (0.23-3.52) | 1 | 0.94 (0.12-7.52) | 1 | 0.92 (0.21-4.00) | 0.94 (0.36-2.45) |
|  | **P-value** | 0,99 | | | 0,89 | | 0,95 | | 0,91 | | 0,9 |
| rs907611 | **Genotype** | G/G | G/A | A/A | G/G | G/A-A/A | G/G-G/A | A/A | G/G-A/A | G/A | --- |
| mi | **mi=0** | 14 (60.9%) | 7 (30.4%) | 2 (8.7%) | 14 (60.9%) | 9 (39.1%) | 21 (91.3%) | 2 (8.7%) | 16 (69.6%) | 7 (30.4%) | --- |
|  | **mi=1** | 7 (58.3%) | 3 (25%) | 2 (16.7%) | 7 (58.3%) | 5 (41.7%) | 10 (83.3%) | 2 (16.7%) | 9 (75%) | 3 (25%) | --- |
|  | **OR (95% CI)** | 1 | 0.86 (0.17-4.37) | 2.00 (0.23-17.34) | 1 | 1.11 (0.27-4.60) | 1 | 2.10 (0.26-17.14) | 1 | 0.76 (0.16-3.70) | 1.24 (0.46-3.35) |
|  | **P-value** | 0,78 | | | 0,88 | | 0,49 | | 0,73 | | 0,67 |
| rs9344 | **Genotype** | G/G | G/A | A/A | G/G | G/A-A/A | G/G-G/A | A/A | G/G-A/A | G/A | --- |
| grade | **grade=1** | 7 (38.9%) | 4 (22.2%) | 7 (38.9%) | 7 (38.9%) | 11 (61.1%) | 11 (61.1%) | 7 (38.9%) | 14 (77.8%) | 4 (22.2%) | --- |
|  | **grade=2** | 6 (37.5%) | 5 (31.2%) | 5 (31.2%) | 6 (37.5%) | 10 (62.5%) | 11 (68.8%) | 5 (31.2%) | 11 (68.8%) | 5 (31.2%) | --- |
|  | **OR (95% CI)** | 1 | 1.46 (0.26-8.05) | 0.83 (0.17-4.06) | 1 | 1.06 (0.27-4.24) | 1 | 0.71 (0.17-2.95) | 1 | 1.59 (0.34-7.37) | 0.92 (0.42-2.02) |
|  | **P-value** | 0,82 | | | 0,93 | | 0,64 | | 0,55 | | 0,83 |
| rs9344 | **Genotype** | G/G | G/A | A/A | G/G | G/A-A/A | G/G-G/A | A/A | G/G-A/A | G/A | --- |
| Muscle invasive | **mi=0** | 8 (34.8%) | 7 (30.4%) | 8 (34.8%) | 8 (34.8%) | 15 (65.2%) | 15 (65.2%) | 8 (34.8%) | 16 (69.6%) | 7 (30.4%) | --- |
|  | **mi=1** | 5 (45.5%) | 2 (18.2%) | 4 (36.4%) | 5 (45.5%) | 6 (54.5%) | 7 (63.6%) | 4 (36.4%) | 9 (81.8%) | 2 (18.2%) | --- |
|  | **OR (95% CI)** | 1 | 0.46 (0.07-3.14) | 0.80 (0.16-4.12) | 1 | 0.64 (0.15-2.77) | 1 | 1.07 (0.24-4.79) | 1 | 0.51 (0.09-2.99) | 0.88 (0.38-2.05) |
|  | **P-value** | 0,71 | | | 0,55 | | 0,93 | | 0,44 | | 0,77 |
|  |  |  |  |  |  |  |  |  |  |  |  |
|  |  |  |  |  |  |  |  |  |  |  |  |
| X152540206SY1 | **Genotype** | G/G | G/A |  |  |  |  |  |  |  |  |
| grade | **grade=1** | 17 (94.4%) | 1 (5.6%) |  |  |  |  |  |  |  |  |
|  | **grade=2** | 22 (100%) | 0 (0%) |  |  |  |  |  |  |  |  |
|  | **OR (95% CI)** | 1 | 0.00 (0.00-NA) |  |  |  |  |  |  |  |  |
|  | **P-value** | 0,2 | |  |  |  |  |  |  |  |  |
|  | **AIC** | 57,4 | |  |  |  |  |  |  |  |  |
|  | **BIC** | 60,8 | |  |  |  |  |  |  |  |  |
| X152540206SY1 | **Genotype** | G/G | G/A |  |  |  |  |  |  |  |  |
| Muscle invasive | **mi=0** | 24 (96%) | 1 (4%) |  |  |  |  |  |  |  |  |
|  | **mi=1** | 15 (100%) | 0 (0%) |  |  |  |  |  |  |  |  |
|  | **OR (95% CI)** | 1 | 0.00 (0.00-NA) |  |  |  |  |  |  |  |  |
|  | **P-value** | 0,33 | |  |  |  |  |  |  |  |  |
| rs11892031 | **Genotype** | A/A | C/A |  |  |  |  |  |  |  |  |
| grade | **grade=1** | 17 (94.4%) | 1 (5.6%) |  |  |  |  |  |  |  |  |
|  | **grade=2** | 20 (95.2%) | 1 (4.8%) |  |  |  |  |  |  |  |  |
|  | **OR (95% CI)** | 1 | 0.85 (0.05-14.64) |  |  |  |  |  |  |  |  |
|  | **P-value** | 0,91 | |  |  |  |  |  |  |  |  |
| rs11892031 | **Genotype** | A/A | C/A |  |  |  |  |  |  |  |  |
| Muscle invasive | **mi=0** | 24 (96%) | 1 (4%) |  |  |  |  |  |  |  |  |
|  | **mi=1** | 13 (92.9%) | 1 (7.1%) |  |  |  |  |  |  |  |  |
|  | **OR (95% CI)** | 1 | 1.85 (0.11-32.01) |  |  |  |  |  |  |  |  |
|  | **P-value** | 0,68 | |  |  |  |  |  |  |  |  |
| rs1495741 | **Genotype** | G/A | A/A |  |  |  |  |  |  |  |  |
| grade | **grade=1** | 15 (83.3%) | 3 (16.7%) |  |  |  |  |  |  |  |  |
|  | **grade=2** | 7 (43.8%) | 9 (56.2%) |  |  |  |  |  |  |  |  |
|  | **OR (95% CI)** | 1 | **6.43 (1.32-31.37)** |  |  |  |  |  |  |  |  |
|  | **P-value** | 0,014 | |  |  |  |  |  |  |  |  |
| rs1495741 | **Genotype** | G/A | A/A |  |  |  |  |  |  |  |  |
| Muscle invasive | **MI=0** | 17 (77.3%) | 5 (22.7%) |  |  |  |  |  |  |  |  |
|  | **MI=1** | 5 (41.7%) | 7 (58.3%) |  |  |  |  |  |  |  |  |
|  | **OR (95% CI)** | 1 | **4.76 (1.04-21.77)** |  |  |  |  |  |  |  |  |
|  | **P-value** | 0,039 | |  |  |  |  |  |  |  |  |
| rs1799782 | **Genotype** | G/G | G/A |  |  |  |  |  |  |  |  |
| grade | **grade=1** | 15 (88.2%) | 2 (11.8%) |  |  |  |  |  |  |  |  |
|  | **grade=2** | 19 (100%) | 0 (0%) |  |  |  |  |  |  |  |  |
|  | **OR (95% CI)** | 1 | 0.00 (0.00-NA) |  |  |  |  |  |  |  |  |
|  | **P-value** | 0,077 | |  |  |  |  |  |  |  |  |
| rs1799782 | **Genotype** | G/G | G/A |  |  |  |  |  |  |  |  |
| Muscle invasive | **mi=0** | 22 (91.7%) | 2 (8.3%) |  |  |  |  |  |  |  |  |
|  | **mi=1** | 12 (100%) | 0 (0%) |  |  |  |  |  |  |  |  |
|  | **OR (95% CI)** | 1 | 0.00 (0.00-NA) |  |  |  |  |  |  |  |  |
|  | **P-value** | 0,19 | |  |  |  |  |  |  |  |  |
| rs1800795 | **Genotype** | C/G | G/G |  |  |  |  |  |  |  |  |
| grade | **grade=1** | 4 (22.2%) | 14 (77.8%) |  |  |  |  |  |  |  |  |
|  | **grade=2** | 5 (22.7%) | 17 (77.3%) |  |  |  |  |  |  |  |  |
|  | **OR (95% CI)** | 1 | 0.97 (0.22-4.32) |  |  |  |  |  |  |  |  |
|  | **P-value** | 0,97 | |  |  |  |  |  |  |  |  |
| rs1800795 | **Genotype** | C/G | G/G |  |  |  |  |  |  |  |  |
| Muscle invasive | **mi=0** | 4 (16%) | 21 (84%) |  |  |  |  |  |  |  |  |
|  | **mi=1** | 5 (33.3%) | 10 (66.7%) |  |  |  |  |  |  |  |  |
|  | **OR (95% CI)** | 1 | 0.38 (0.08-1.73) |  |  |  |  |  |  |  |  |
|  | **P-value** | 0,21 | |  |  |  |  |  |  |  |  |
| rs1801282 | **Genotype** | C/C | G/C |  |  |  |  |  |  |  |  |
| grade | **grade=1** | 13 (76.5%) | 4 (23.5%) |  |  |  |  |  |  |  |  |
|  | **grade=2** | 18 (90%) | 2 (10%) |  |  |  |  |  |  |  |  |
|  | **OR (95% CI)** | 1 | 0.36 (0.06-2.28) |  |  |  |  |  |  |  |  |
|  | **P-value** | 0,26 | |  |  |  |  |  |  |  |  |
| rs1801282 | **Genotype** | C/C | G/C |  |  |  |  |  |  |  |  |
| Muscle invasive | **mi=0** | 18 (78.3%) | 5 (21.7%) |  |  |  |  |  |  |  |  |
|  | **mi=1** | 13 (92.9%) | 1 (7.1%) |  |  |  |  |  |  |  |  |
|  | **OR (95% CI)** | 1 | 0.28 (0.03-2.66) |  |  |  |  |  |  |  |  |
|  | **P-value** | 0,22 | |  |  |  |  |  |  |  |  |
| rs710521 | **Genotype** | T/T | C/T |  |  |  |  |  |  |  |  |
| grade | **grade=1** | 17 (100%) | 0 (0%) |  |  |  |  |  |  |  |  |
|  | **grade=2** | 17 (94.4%) | 1 (5.6%) |  |  |  |  |  |  |  |  |
|  | **OR (95% CI)** | 1 | NA (0.00-NA) |  |  |  |  |  |  |  |  |
|  | **P-value** | 0,24 | |  |  |  |  |  |  |  |  |
| rs710521 | **Genotype** | T/T | C/T |  |  |  |  |  |  |  |  |
| Muscle invasive | **mi=0** | 24 (100%) | 0 (0%) |  |  |  |  |  |  |  |  |
|  | **mi=1** | 10 (90.9%) | 1 (9.1%) |  |  |  |  |  |  |  |  |
|  | **OR (95% CI)** | 1 | NA (0.00-NA) |  |  |  |  |  |  |  |  |
|  | **P-value** | 0,12 | |  |  |  |  |  |  |  |  |

We recalculated the p value after adjusting for multiple comparisons with the Bonferroni-corrected significance level. For the SNVs with only two genotyes (e.g. rs149571) the adjusted p value 0.05/4 = 0.0125 and those with 3 genotypes (e.g. rs10775480) corrected p value would be 0.05/6 = 0.0083. None of the selected 23 SNVs reached significance with the corrected p values.
