# Supplementary material for: Somatic genetic variants associated with aggressiveness of urothelial bladder cancer: a prospective cohort study
Source: Research Square preprint supplement (doi:10.21203/rs.3.rs-6553154/v1), 2025-05-12
Supplement: Supplementary file 2 [file 944a07eb92f95ac554d0311e.docx]

**Supplementary Data 1**

**SNVs selected for final association analysis**

The details of the selected 23 SNVs with the factors relevant to conformity to the Hardy Weinburg Equilibrium and selection for further analysis are given in the following table.

Table The 23 SNVs conforming to the Hardy Weinburg Equilibrium and to other criteria:

| **rs number / chr position** | **Gene** | **Percentage of individuals successfully genotyped for each SNP** | **HWE - Chi Square** | ***p value*** | **variant allele frequency** |
| --- | --- | --- | --- | --- | --- |
| 152540206SY1 |  | 98% | 0,0444 | 0,8331 | 0,0125 |
| rs1052133 | OGG1 | 93% | 0,1342 | 0,7141 | 0,3816 |
| rs10775480 | SLC14A1 | 76% | 0,1856 | 0,6666 | 0,7742 |
| rs10936599 |  | 88% | 3,3101 | 0,0689 | 0,1389 |
| rs11892031 | UGT1A10 | 95% | 0,0270 | 0,8695 | 0,0256 |
| rs1495741 |  | 83% | 7,7769 | 0,0053 | 0,6765 |
| rs17674580 | SLC14A1 | 78% | 0,0546 | 0,8152 | 0,2656 |
| rs1799782 | *XRCC1* | 88% | 0,0294 | 0,8639 | 0,0278 |
| rs1799964 | LTA | 98% | 1,1111 | 0,2918 | 0,3000 |
| rs1800795 | IL6 | 98% | 0,6427 | 0,4227 | 0,8875 |
| rs1801282 | *PPARG* | 90% | 0,2881 | 0,5914 | 0,0811 |
| rs1801320 | RAD51 | 83% | 0,0048 | 0,9448 | 0,1765 |
| rs1946518 | IL18 | 88% | 4,5754 | 0,0324 | 0,7361 |
| rs2228001 | XPC | 88% | 0,9313 | 0,3345 | 0,5417 |
| rs2294008 | PSCA | 95% | 1,2168 | 0,2700 | 0,3718 |
| rs2854744 | IGFBP3 | 88% | 4,7928 | 0,0286 | 0,4028 |
| rs2989734 | FCN1 | 100% | 0,4010 | 0,5266 | 0,6829 |
| rs401681 | CLPTM1L | 90% | 0,2381 | 0,6256 | 0,2027 |
| rs4976845 | MYO16 | 95% | 0,2200 | 0,6390 | 0,2949 |
| rs710521 |  | 85% | 0,0074 | 0,9314 | 0,0143 |
| rs7238033 | SLC14A1 | 95% | 0,3553 | 0,5511 | 0,7564 |
| rs907611 | *LSP1* | 85% | 2,2251 | 0,1358 | 0,2571 |
| rs9344 | *CCND1* | 83% | 7,5148 | 0,0061 | 0,4853 |
